# Supplementary material for: A comprehensive prediction model for central lymph node metastasis in papillary thyroid carcinoma with Hashimoto’s thyroiditis: BRAF may not be a valuable predictor
Source: Front Endocrinol (Lausanne). 2024 Sep 19;15:1429382. doi: 10.3389/fendo.2024.1429382 (PMC11446765; doi:10.3389/fendo.2024.1429382)
Supplement: Supplementary file 1 [file DataSheet1.xlsx]

## Sheet: HT
ID	Gender	Age	FT3	FT4	TSH	TG	TG-Ab	TPO-Ab	TR-Ab	lgTR-Ab	CT	Ti-rads	TBSRTC	BRAF	Maximum diameter	Aspect ratio	Microcalcification	Multifocality	Extrathyroidal extension	Boundary	Margin	Markedly hypoechoic	Vascularity	Location	Lymph node metastasis
1	0	62	4.32	16.23	0.085	0	2597	397.8	1.26	0.100371	2	4a	1	1	0	1	1	0	0	0	1	0	0	3	0
2	0	59	0.83	1.95	84.52	0	326.2	232.49	0.92	-0.0362122	5.35	4c	1	1	0	1	1	0	0	0	1	0	1	1	1
3	0	26	3.82	13.47	1.33	0.4	616.6	6.92	0.71	-0.148742	2.15	4b	0	1	0	1	0	0	1	1	1	0	1	1	1
4	1	40	6.05	17.09	2	2.4	376.5	16.12	0.5	-0.30103	8.43	4b	1	1	1	0	1	1	0	1	1	0	0	1	1
5	0	41	4.6	15.41	2.22	1.1	131	56.64	0.47	-0.327902	2	4a	1	1	1	0	1	0	0	0	0	1	0	3	0
6	0	34	4.97	16.27	2.8	0.9	111.2	440.2	0.85	-0.0705811	5.09	4a	1	1	1	0	1	0	0	1	1	1	0	3	0
7	0	63	4.52	20.47	2.59	0	727.4	51.09	0.45	-0.346787	5.84	4a	1	1	1	1	1	0	0	0	0	0	1	3	0
8	1	35	4.61	11.27	10.99	118	336.8	41.1	1.04	0.0170333	18.3	4a	1	1	1	0	1	1	0	1	1	0	1	1	1
9	0	29	5.59	15.95	1.82	8.6	87.02	288	1.03	0.0128372	2.7	4a	1	0	1	0	1	0	0	0	1	1	0	3	0
10	0	68	5.67	13.76	3.23	2	70.54	516	0.25	-0.60206	4.64	4b	1	1	0	0	1	0	1	0	1	0	1	1	1
11	0	29	4.91	8.66	2.13	14.96	6.9	849.2	0.92	-0.0362122	5.35	4b	1	1	1	0	1	1	0	0	0	0	0	2	0
12	0	33	4.51	14.57	3.82	191	426.6	23.8	0.38	-0.420216	2.91	4b	1	0	1	0	1	1	0	1	1	0	0	3	1
13	0	43	3.93	17.17	1.99	29.6	246.4	0.91	0.41	-0.387216	5.98	4b	1	1	1	0	0	0	0	0	0	1	0	3	0
14	1	52	5.49	18.16	0.536	63.3	225.8	470	0.53	-0.275724	7.33	4a	1	1	0	0	1	0	1	0	1	0	0	3	1
15	0	37	1.18	2.76	84.89	4.3	51.74	232.49	0.92	-0.0362122	5.35	4a	1	1	1	1	1	1	0	0	0	0	0	1	1
16	0	40	4.7	14.96	2.75	32.1	241.8	1.59	0.31	-0.508638	4.68	4a	1	0	1	1	1	0	0	1	1	1	0	2	0
17	0	43	4.75	19.67	0.825	11.2	600.6	15.5	0.31	-0.508638	5.8	4a	1	1	0	1	1	0	0	0	0	0	0	1	0
18	0	44	4.13	13.9	0.985	11.8	409.5	436	0.36	-0.443697	3.76	4c	1	1	0	0	1	0	0	0	1	0	1	1	0
19	0	50	4.77	13.58	5.02	24.78	782.2	3.76	0.92	-0.0362122	5.35	4a	1	1	0	1	0	0	0	0	0	0	1	3	0
20	0	50	4.25	17.21	0.884	2.1	146.4	322	0.57	-0.244125	7.12	4b	1	1	1	1	1	1	0	0	1	0	0	1	1
21	0	30	5.15	17.99	2.36	0.8	3642	506	0.37	-0.431798	2	4b	1	0	1	0	1	0	0	0	0	1	0	3	1
22	0	43	4.81	13.4	1.8	28.1	181.2	1.91	0.76	-0.119186	3.63	4a	0	0	1	1	1	0	0	0	1	0	0	2	0
23	0	51	4.23	17.03	3.14	16.9	170.1	712	5.15	0.711807	5.35	4a	1	1	1	0	0	0	0	0	0	0	0	1	0
24	0	43	4.52	16.38	2.12	28.9	270.7	887	0.29	-0.537602	2.19	4a	1	1	1	0	1	0	0	1	1	0	1	3	1
25	0	55	5.22	19.83	1.84	46.8	43.55	3.13	0.37	-0.431798	5.35	4c	0	1	1	0	0	0	0	1	1	0	1	1	0
26	0	60	4.22	14.8	2.19	5.7	268.8	2.03	0.39	-0.408935	7.05	4b	1	1	1	0	1	1	0	0	1	0	0	2	0
27	1	32	5.79	15.4	2.48	38.2	227.1	450	0.55	-0.259637	5.35	4b	1	1	0	0	1	1	1	0	1	0	0	3	1
28	0	39	4.44	16.83	1	14.1	36.81	536	1.24	0.0934217	7.55	4a	0	1	1	0	0	1	0	1	0	0	0	3	0
29	0	51	5.75	21.78	0.283	8	35.87	3.6	1.09	0.0374265	11.6	4b	0	1	1	0	1	0	0	1	0	0	0	1	0
30	0	48	5.24	14.07	2.72	11.9	459.8	3.96	0.25	-0.60206	2	4b	1	1	0	1	1	0	0	1	1	0	0	1	1
31	0	56	4.05	13.04	2.64	0.2	465.1	9.63	0.68	-0.167491	5.27	4a	1	1	1	0	0	1	0	0	0	1	0	2	1
32	0	32	4.61	13.83	4	6.1	157	209	0.25	-0.60206	5.35	4a	1	0	1	0	1	0	0	1	1	0	0	2	1
33	0	43	4.76	16.79	5.74	27.8	59.77	982	1.43	0.155336	2	4b	1	0	1	0	0	1	0	0	1	0	0	2	0
34	0	45	5.43	16.34	2.48	14.96	292	646	0.92	-0.0362122	5.35	4a	1	1	1	0	0	0	0	1	0	0	0	1	0
35	1	42	4.76	12.49	2.13	9.8	132.9	583	0.42	-0.376751	3.72	4b	1	1	0	0	0	1	0	1	1	0	0	3	1
36	0	55	4.76	13.33	3.06	13.6	17.03	219	1.04	0.0170333	3.72	4a	1	1	1	0	0	0	1	0	1	1	0	2	0
37	0	39	4.21	13.95	5.06	6.3	59.29	627	0.34	-0.468521	5.35	4a	0	1	1	0	1	0	0	1	1	0	0	2	1
38	0	35	5.66	21.68	0.675	21.3	115.9	137	0.25	-0.60206	2.46	4b	1	1	1	0	1	1	0	0	0	1	0	1	1
39	0	59	4.31	14.25	4.82	1.9	60.14	1000	0.25	-0.60206	2	4a	1	0	1	0	1	0	1	1	0	0	0	3	0
40	1	40	3.82	14.65	17.8	0	202.5	232.49	0.92	-0.0362122	2	4a	1	1	1	0	0	0	0	1	0	0	0	4	0
41	1	48	5.25	19.59	1.27	11.3	52.98	432	0.27	-0.568636	5.35	4a	1	1	0	0	1	1	1	0	0	0	1	1	1
42	0	41	5.77	15.08	1.64	0.9	165.3	355	0.76	-0.119186	7.7	4a	0	1	1	0	1	0	0	1	1	0	0	2	0
43	0	44	4.04	15.08	3.03	9.1	0.3	48.71	0.59	-0.229148	6.03	4b	1	1	0	0	0	0	1	0	1	0	0	3	1
44	1	37	6.2	27.02	0.019	0.2	457.2	10.38	0.54	-0.267606	5.35	4a	1	1	0	0	1	0	0	1	1	1	1	1	1
45	0	28	3.06	12.54	69.25	0.1	145.1	232.49	0.92	-0.0362122	5.35	4a	1	1	1	0	1	1	0	0	0	0	0	1	0
46	0	24	4.5	19.4	1.35	1.7	4000	20.92	0.84	-0.0757207	5.29	4b	0	1	0	0	1	0	0	0	1	0	0	3	0
47	0	42	4.52	13.87	3.03	41.2	67.42	134.8	0.71	-0.148742	5.87	5	0	1	0	0	1	1	1	0	1	1	1	3	1
48	0	60	4.44	18.79	1.41	18.2	274.5	10.62	0.65	-0.187087	5.35	4b	0	0	1	0	1	0	1	1	1	0	0	1	0
49	0	46	4.47	18.82	1.51	0.2	624.8	43.08	0.67	-0.173925	6.56	4a	1	1	1	0	0	0	0	0	1	1	0	2	1
50	0	48	4.38	16.4	3.15	0.1	1037	9.32	1.04	0.0170333	4.75	4a	0	1	0	0	1	0	0	0	0	0	0	2	0
51	0	25	4.2	13.31	3.56	20.7	404.8	213.4	0.55	-0.259637	6.02	4b	1	1	1	0	0	0	0	1	0	1	0	2	0
52	1	45	5.3	9.37	0.93	14.96	0.2	45.5	0.69	-0.161151	9.55	4a	1	1	1	0	1	0	0	0	1	0	1	2	0
53	0	57	4.08	13.68	4.14	35.9	301.4	62.04	0.74	-0.130768	3.97	4b	0	1	0	0	1	0	1	0	0	1	0	3	0
54	0	55	4.12	13.64	1.65	0.5	140	337.6	1.03	0.0128372	5.35	4a	1	1	1	0	1	0	0	0	1	0	0	3	0
55	1	33	4.59	16.13	2.47	0.5	998	18.95	0.28	-0.552842	6.88	4a	1	0	0	1	1	1	0	1	1	0	0	2	1
56	0	21	4.17	15.88	3.34	0.1	1512	96.54	0.78	-0.107905	2	4b	1	1	1	1	1	0	0	0	0	0	0	1	0
57	0	25	4.93	16.73	2.38	0	24.96	473.1	0.71	-0.148742	5.35	4a	0	0	0	1	1	0	0	1	1	1	0	2	0
58	0	47	4.97	18.47	1.69	10.8	94.51	301.3	0.43	-0.366532	5.14	4a	1	1	1	0	0	0	0	1	1	0	0	2	1
59	0	26	4.47	18.04	1.51	7.8	60.49	287.1	0.78	-0.107905	7.47	4b	0	1	0	1	1	0	0	1	0	0	0	2	0
60	0	30	4.56	18.14	1.02	89.4	380.7	145.8	0.45	-0.346787	4.6	4b	1	1	1	0	0	1	0	0	1	1	0	1	0
61	0	31	4.94	17.3	5.18	31.3	66.49	600	0.47	-0.327902	5.53	4b	1	1	0	1	0	1	0	0	1	0	0	3	1
62	0	34	3.72	16.97	5.08	0	179.5	38.55	0.46	-0.337242	4.61	4a	1	0	1	0	1	1	0	1	1	0	0	2	0
63	0	56	4.71	17.71	1.77	7	52.23	121.8	0.36	-0.443697	4.14	4a	1	1	0	1	1	1	0	1	0	0	0	2	1
64	0	30	4.48	17.54	3.71	0.6	69.85	164.3	1.16	0.064458	8.43	4a	1	1	0	1	1	0	0	0	1	0	0	1	1
65	0	48	4.76	14.76	2.37	10.8	311.4	13.85	0.45	-0.346787	5.35	5	1	1	0	0	1	1	0	0	1	0	0	1	1
66	0	45	3.71	14.12	1.78	2.3	1116	25.87	1.01	0.00432137	6.96	4b	1	1	1	0	1	1	1	1	1	0	0	1	0
67	0	41	4.95	16.54	3.13	21.1	463.4	9.79	0.55	-0.259637	4.17	5	0	0	1	0	1	0	1	1	1	1	0	2	0
68	0	36	4.57	17.13	6.67	20.5	176.7	600	0.78	-0.107905	5.35	4c	0	1	1	0	0	0	0	0	0	1	0	2	0
69	0	37	4.53	12.72	2.87	38.7	314.5	6.2	0.41	-0.387216	5.96	4a	1	1	1	1	1	0	0	0	0	0	0	2	0
70	0	29	4.52	16.24	1.49	24.7	425.1	5.54	1.02	0.00860017	5.56	4a	1	1	0	1	1	0	0	0	1	0	0	2	1
71	0	55	5.87	21.67	0.721	3.1	26.49	379.5	1.18	0.071882	2.92	4c	0	1	0	0	1	0	0	0	1	0	1	3	0
72	0	25	4.97	19.81	1.39	0.8	293.5	8.88	0.54	-0.267606	3.66	4a	0	0	0	1	1	1	1	1	1	0	0	4	1
73	0	63	4.78	16	3.21	15.1	148.2	12.23	1.08	0.0334238	4.49	4b	1	0	1	0	1	1	0	1	1	0	0	3	0
74	0	64	5.11	19.72	1.42	0.3	184.8	11.26	1.17	0.0681859	12.7	4a	0	1	1	0	1	0	0	1	0	0	0	3	1
75	0	59	5.35	18.23	1.29	0.1	258.9	10.71	0.9	-0.0457575	5.02	3	1	1	0	1	0	1	0	0	0	0	0	1	1
76	0	62	4.31	17.95	2.95	20	186.7	84.66	0.48	-0.318759	2.27	4b	0	0	0	1	1	0	1	0	1	0	0	3	1
77	1	28	5.67	17.91	1.72	9.3	214	25.41	1	0	5.35	4b	1	1	0	0	1	1	0	1	1	0	0	2	1
78	0	49	4.48	20.21	5.42	0.8	380.5	14.53	1.17	0.0681859	3.97	4b	1	1	1	1	0	0	1	0	1	1	0	1	1
79	0	45	4.42	19.02	3.69	0	4000	185.3	1.06	0.0253059	3.03	5	0	0	0	1	1	0	1	1	1	0	0	3	1
80	0	49	4.45	15.95	1.94	25.3	120.6	34.41	0.63	-0.200659	5.35	4a	1	1	0	1	1	1	0	0	1	1	0	3	1
81	0	73	3	17.9	5.6	0.1	296.6	232.49	0.92	-0.0362122	5.35	4a	1	1	0	0	1	1	0	0	1	0	1	3	0
82	0	28	4.57	13.47	1.68	18.8	316.8	5.76	1.04	0.0170333	5.5	5	0	1	0	0	1	1	1	1	1	0	1	2	1
83	0	56	4.68	17.09	2.58	0.1	210.7	71.45	1.02	0.00860017	4.61	5	1	1	1	1	1	1	1	0	1	0	0	3	1
84	0	62	4.32	16.23	0.085	0	2597	397.8	1.26	0.100371	2	4a	1	0	0	1	1	0	0	1	1	0	0	3	0
85	0	43	4.15	13.92	3.65	34.7	260.8	131.6	1.54	0.187521	5.35	4b	0	1	1	0	0	0	0	1	1	0	0	2	0
86	0	35	2.73	10.38	0.174	14.96	10	37.43	0.92	-0.0362122	5.35	5	1	1	1	0	1	0	0	1	1	1	1	2	0
87	0	68	5.96	23.41	0.544	2.6	648	10.22	0.25	-0.60206	2	4a	0	0	1	0	0	0	0	1	0	0	0	3	0
88	0	54	4.5	15.16	1.48	0.1	367.4	50.49	0.56	-0.251812	2	4b	1	1	0	1	1	1	0	1	1	0	0	3	1
89	0	59	4.09	18.31	1.36	1.1	1099	14.53	1.09	0.0374265	3.81	4c	1	1	0	1	1	0	0	1	1	0	1	1	1
90	1	40	5.09	7.78	11.09	107	8.625	222.2	1.68	0.225309	5.53	4a	0	1	0	0	0	1	1	1	0	0	1	1	1
91	0	49	5.1	13.88	0.03	0	358.2	568.9	0.78	-0.107905	5.75	4a	0	1	1	0	0	0	0	1	1	0	0	3	0
92	0	51	4.72	25.43	0.042	0.1	899.7	303.5	0.82	-0.0861861	5.35	4c	1	1	0	1	1	0	1	1	1	0	1	4	1
93	0	51	4.76	7.42	15.49	182	54.625	904	0.71	-0.148742	5.63	4a	0	1	0	0	0	0	0	0	0	0	1	3	0
94	0	56	7.46	24.6	0.013	0.7	15.88	375	0.74	-0.130768	5.35	4c	0	0	0	1	1	0	1	0	1	0	1	1	1
95	0	52	5.62	13.22	0.87	19.5	169.6	16.6	0.65	-0.187087	6.84	4a	1	1	1	0	0	0	0	0	0	1	0	1	0
96	0	49	5.01	11.59	2.22	5.5	349.8	127.3	1.15	0.0606978	4.16	4b	1	1	0	1	1	0	0	1	1	0	0	2	0
97	0	42	4.61	7.76	2.49	1.8	66.125	127.4	0.37	-0.431798	5.35	4a	0	1	1	0	1	0	0	1	1	1	1	2	0
98	0	60	5.47	10.86	0.74	5.3	1534	425	0.5	-0.30103	5.33	4b	0	0	0	1	1	1	1	0	0	0	1	1	0
99	0	54	5.05	8.29	2.04	1.4	665.5	21.72	1.5	0.176091	6.61	4b	1	1	1	0	1	0	0	0	1	0	0	2	0
100	0	63	4.84	8.3	3.46	10.3	74.75	98.84	0.8	-0.09691	5.37	4a	0	1	0	1	0	1	0	1	1	0	1	2	1
101	1	55	4.54	8.83	0.51	0.3	224	11.5	0.62	-0.207608	9.22	4a	1	1	1	0	0	0	0	0	0	0	0	2	1
102	0	39	4.56	10.59	3.53	1.1	258	291	0.25	-0.60206	6.33	3	1	1	0	1	0	0	0	0	0	0	0	3	0
103	0	29	6.71	11.79	2.59	20.7	48.875	376	1.08	0.0334238	5.67	4b	0	1	1	0	1	1	0	0	0	1	0	2	0
104	0	56	4.77	13.52	2.09	12.2	717	515	0.33	-0.481486	7.29	4a	1	1	0	1	1	1	0	0	1	0	1	2	1
105	0	39	5.82	14.74	0.62	0.8	958.5	435	1	0	8.62	4a	1	0	1	0	1	1	0	1	1	0	0	2	0
106	0	31	5.72	7.3	0.01	0.2	1295	145.7	13.5	1.13033	5.42	4b	1	1	0	1	1	0	0	1	1	0	1	2	0
107	0	29	3.4	15.9	0.904	0.1	4000	332.6	0.42	-0.376751	5.35	4a	1	1	0	1	1	1	0	0	1	0	0	1	1
108	0	62	4.95	10.78	3.42	0.1	349	95.11	0.76	-0.119186	5.15	4b	1	1	0	1	1	1	1	0	1	0	1	2	1
109	0	33	5.21	11.45	1.41	0.8	232	211.5	1.04	0.0170333	2.8	4a	1	1	1	0	1	0	0	0	1	1	0	3	1
110	0	53	5.75	13.37	0.67	0.1	458.3	10.63	0.79	-0.102373	5.28	3	1	1	1	1	0	0	0	0	0	0	1	1	1
111	1	32	6.14	21.2	1.42	9.2	149.7	0.74	1.12	0.049218	2	3	1	1	1	0	0	0	0	1	0	0	0	3	1
112	0	45	6.05	11.6	2.91	6.8	272.8	487.9	3.62	0.558709	6.11	5	1	1	0	1	1	0	0	1	1	1	0	2	0
113	0	42	4.45	11.64	1.39	0.5	3.2	399.3	0.25	-0.60206	5.89	3	1	1	1	1	1	1	0	0	1	0	0	3	1
114	0	33	4.47	11.7	2.03	15.4	208.8	29.63	0.77	-0.113509	5.35	4a	0	1	1	0	0	1	1	1	1	0	0	1	0
115	0	63	5.76	11.25	1.19	1.7	491	53.66	1.04	0.0170333	7.64	4a	1	0	0	1	1	0	1	0	1	0	0	4	0
116	0	56	5.65	10.76	1.2	17.7	51.75	294	0.8	-0.09691	6.2	4a	1	1	0	0	1	0	0	1	0	0	0	4	0
117	0	43	4.09	10.37	3.59	5.1	124	3.8	0.98	-0.00877392	5.62	4a	1	0	0	0	1	1	0	1	1	0	0	1	1
118	1	53	5.53	9.87	1.61	14.3	0	506	0.87	-0.0604807	6.72	4a	1	0	1	1	0	1	0	1	0	0	0	3	0
119	0	40	4.62	12.5	1.48	0	303	10.21	1.06	0.0253059	5.35	4b	1	1	0	0	1	1	0	1	0	0	0	3	1
120	0	31	5.54	12.48	2.18	9.4	0.9	1039	1.03	0.0128372	6.6	5	1	1	0	1	1	1	0	0	1	0	1	3	1
121	0	53	5.52	8.6	2.45	8.4	321	923	1.32	0.120574	7.81	4b	0	1	0	1	0	1	0	1	1	0	0	3	0
122	0	53	5.87	11.82	1.11	10.3	71.875	90.8	0.25	-0.60206	5.05	5	1	1	1	0	1	0	0	0	1	0	0	1	1
123	0	47	4.73	11.1	0.94	0.5	162	105.9	1.31	0.117271	8.94	4a	1	1	1	0	1	0	0	1	1	0	0	2	0
124	1	71	5.63	11.34	1.96	3.6	195.5	244.4	0.38	-0.420216	7.5	4a	1	1	0	1	1	1	0	0	0	0	1	3	1
125	0	37	4.79	11.45	2.6	14.96	60.375	309.6	0.92	-0.0362122	5.19	4b	0	1	0	0	0	1	0	1	1	1	0	3	1
126	0	57	4.57	15.97	2.64	1.2	340	35	0.65	-0.187087	5.17	5	1	1	0	1	1	1	0	1	1	0	0	1	1
127	0	61	4.61	14.06	1.22	45.2	17.25	249	1.3	0.113943	5.35	4b	1	1	1	0	1	1	0	0	1	0	1	1	0
128	0	31	5.13	19.85	1.93	0.6	1005	259	0.48	-0.318759	5.97	4a	0	0	0	0	1	0	0	1	1	1	0	3	0
129	0	51	2.11	6.21	8.27	7.6	1115.1	600	3.06	0.485721	5.35	4a	0	1	1	0	1	1	0	0	1	0	0	2	0

## Sheet: non-HT
ID	Gender	Age	FT3	FT4	TSH	TG	TG-Ab	TPO-Ab	TR-Ab	lgTR-Ab	CT	Ti-rads	TBSRTC	BRAF	Maximum diameter	Aspect ratio	Microcalcification	Multifocality	Extrathyroidal extension	Boundary	Margin	Markedly hypoechoic	Vascularity	Location	Lymph node metastasis
1	0	34	4.51	13.88	0.58	71.1	10.08	8.14	1.03	0.0128372	5.13	4a	1	1	0	1	1	1	0	1	0	0	1	2	0
2	0	41	4.19	19.73	1.05	123	10	5.45	1.03	0.0128372	4.85	4b	1	0	1	0	1	1	0	0	1	1	1	1	1
3	0	35	5.03	18.98	1.38	61.1	10	4.26	0.58	-0.236572	6.55	4c	1	0	1	0	0	0	0	1	1	0	0	2	1
4	1	22	5.23	16.51	1.75	11	10	10.22	0.58	-0.236572	4.86	4a	1	1	1	1	0	1	1	1	1	0	0	1	1
5	0	32	5.04	17.46	1.11	63.8	11.05	13.14	0.88	-0.0555173	8.87	5	1	1	0	1	1	0	0	0	0	0	1	2	1
6	0	45	4.92	13.56	2.53	1.5	16.99	30.9	0.38	-0.420216	11.3	4b	1	0	1	1	0	0	0	0	1	0	0	2	0
7	1	55	5.08	18.33	2.67	4.2	12.07	11.33	0.25	-0.60206	9.53	4a	1	0	1	1	1	0	0	0	0	0	0	2	0
8	0	27	5.44	15.99	3.06	0	38.39	4.65	0.45	-0.346787	2	4b	1	0	1	0	0	0	0	1	1	1	1	2	1
9	1	34	3.2	8.45	0.8	24.9	12.33	19.71	0.27	-0.568636	28.7	4c	1	0	0	0	0	0	1	1	0	1	0	1	0
10	0	47	4.07	13.29	0.68	0.8	15.73	4.22	0.41	-0.387216	4.54	4b	1	0	0	1	0	0	0	1	0	1	1	1	0
11	0	29	5.11	16.29	3.35	35.6	13.77	13.36	0.72	-0.142668	2.17	4b	1	0	0	1	1	1	1	0	0	0	0	2	1
12	0	68	4.99	15.19	1.26	28.5	13.51	12.82	0.42	-0.376751	2.93	4b	1	0	1	1	0	1	1	1	0	0	0	2	0
13	1	44	5.07	13.91	2.37	5.4	12.08	9.9	0.49	-0.309804	6.62	4a	1	0	1	1	1	0	1	1	0	0	0	2	1
14	1	30	5.49	13.5	2.26	18.8	10	5.45	0.85	-0.0705811	5.14	4c	1	0	1	1	0	1	1	1	1	0	0	1	1
15	0	43	3.71	12.93	0.48	57.38	13.24	18.6	0.61	-0.21467	12.14	4a	1	0	1	0	1	1	0	0	0	1	0	3	1
16	0	52	4.67	13.9	1.62	23.2	10	5.39	0.6	-0.221849	4.36	4b	1	0	0	1	1	0	0	1	0	1	1	1	1
17	0	48	4.76	16.3	1.97	23.5	14.61	17.33	0.47	-0.327902	8.49	4c	1	0	0	1	1	1	1	0	1	0	0	1	1
18	0	49	4.2	14.94	4.74	3.01	45.97	9.28	0.56	-0.251812	2.48	4b	0	1	1	1	1	1	1	1	0	1	0	1	1
19	0	38	4.51	15.6	0.93	57.3	13.99	15.27	1.1	0.0413927	10.98	4a	1	0	1	1	0	1	0	1	1	1	1	2	1
20	0	52	4.56	16.73	1.17	18.2	13.11	14.21	0.26	-0.585027	3.99	4a	0	1	1	1	0	1	1	1	0	0	0	2	1
21	1	37	5.58	13.32	4.04	27.2	13.39	10.74	1.01	0.00432137	5.11	4b	1	0	0	0	1	1	1	0	0	1	1	1	1
22	0	38	4.5	20.81	0.97	0.4	41.58	12.18	0.8	-0.09691	7.53	4a	1	1	1	1	1	1	0	1	1	0	1	2	1
23	1	42	5.41	19.1	1.3	6.1	12.6	19.49	0.54	-0.267606	9.32	4a	0	0	0	0	1	1	1	0	1	1	1	2	1
24	0	31	5.54	15.31	0.83	7.7	11.5	15.74	0.26	-0.585027	5.95	4b	1	0	1	0	1	0	0	0	0	1	0	1	0
25	0	40	4.72	22.64	0.01	43.94	14.95	3.09	1.87	0.271842	3.42	4b	1	0	1	1	0	1	1	1	0	1	0	3	1
26	1	23	4.57	19.7	1.03	8.9	11.56	0.89	0.28	-0.552842	4.12	4b	1	0	0	0	0	0	1	0	0	1	0	2	1
27	1	33	5.2	18.57	2.66	15.6	11.01	15.76	0.25	-0.60206	16.6	5	1	1	0	1	1	0	0	1	1	0	1	2	1
28	0	34	3.63	11.24	0.59	96.8	10.29	2.55	0.28	-0.552842	9.31	4a	1	0	0	1	0	0	0	1	0	1	0	2	1
29	1	51	6.09	19.25	1.36	18.9	11.64	1.47	0.25	-0.60206	12	4b	1	1	1	0	0	0	1	1	0	1	1	2	1
30	0	44	4.02	14.22	2.86	28	10.38	2.13	1.17	0.0681859	2	4a	1	0	1	1	0	0	0	0	0	0	1	3	1
31	0	35	4.07	13.82	1.7	20	13.75	0.96	0.41	-0.387216	3.32	4b	1	1	0	0	0	1	1	0	0	0	0	1	1
32	0	21	3.71	15.59	1.16	18	10.92	0.79	0.3	-0.522879	5.58	4b	1	0	0	1	1	0	0	1	0	1	1	2	1
33	0	42	3.37	14.7	1.71	33.9	14.97	2.15	0.25	-0.60206	2	4a	1	1	1	0	1	1	0	0	0	0	1	2	0
34	0	59	3.97	17.15	2.13	2.4	13.64	1.11	0.41	-0.387216	4.79	4a	1	1	0	1	1	0	0	0	0	0	1	1	1
35	0	50	4.61	18.95	1.93	11.9	15.39	2.46	1.41	0.149219	3.6	4a	1	1	1	1	0	0	1	0	0	0	1	1	0
36	0	52	5.29	16.51	1.87	10.6	10.91	7.92	0.36	-0.443697	9.4	4a	1	1	0	0	1	0	1	0	0	0	0	2	1
37	0	37	4.33	15.9	3.56	0.8	75.43	3.5	0.25	-0.60206	9.8	4a	1	0	1	0	0	1	0	0	0	0	1	2	1
38	1	61	5.16	18.31	1.12	9.1	12.57	0.82	0.28	-0.552842	16.1	4a	0	1	1	0	0	0	0	1	0	1	1	2	0
39	1	63	4.93	12.24	2.16	15.8	13.12	1.31	0.46	-0.337242	7.2	4b	1	1	1	0	1	0	0	0	0	0	1	1	0
40	0	64	3.42	16.81	3.05	22.7	13.36	1.39	0.38	-0.420216	2.17	4a	1	1	0	1	1	1	1	1	1	0	1	2	1
41	0	46	4.14	13.61	2.27	10.8	23.67	1.85	0.32	-0.49485	2.24	4b	1	0	0	1	1	0	0	1	0	0	1	2	1
42	0	35	4.67	15.03	1.52	11.2	13.09	1.5	0.85	-0.0705811	5.46	4a	1	1	0	0	1	1	1	1	0	1	0	3	1
43	0	55	4.2	16.23	2.62	22.4	12.04	1.09	0.76	-0.119186	2.79	4a	1	0	1	1	1	1	0	1	1	0	1	2	1
44	0	48	4.31	14.37	3.22	4.4	17.44	2.49	0.57	-0.244125	7.22	4a	1	1	1	1	0	0	0	1	1	1	1	2	0
45	0	43	4.11	14.77	2.79	47.7	13.63	5.2	0.33	-0.481486	2	4a	0	0	1	0	0	0	0	0	1	1	0	1	1
46	1	26	7.39	22.78	0.78	1	36.89	57.9	0.88	-0.0555173	11.1	4b	1	1	1	1	0	1	1	1	0	1	1	1	0
47	1	31	5.64	14.99	3.6	9.5	15.35	0.82	0.37	-0.431798	2.43	4a	1	1	1	1	0	0	0	0	0	1	0	1	0
48	0	41	4.16	16.45	1.34	6	19.83	4.62	0.29	-0.537602	3.31	4a	1	0	1	1	0	0	1	0	0	0	0	2	1
49	0	59	5.12	14.96	2.58	10	14.7	0.74	0.34	-0.468521	2.58	4a	1	1	1	1	0	1	0	1	1	0	0	2	0
50	0	39	4.83	17.04	1.28	9.1	14.54	1.01	1.5	0.176091	3.41	4a	1	1	1	1	0	0	0	1	1	1	1	1	0
51	0	68	4.12	17.5	1.99	85.7	12.89	1.06	0.44	-0.356547	3.7	4a	1	1	1	0	0	0	0	0	1	0	1	2	0
52	0	56	4.91	18.33	2.79	3.4	13.85	1.52	0.51	-0.29243	4.82	4a	0	1	1	1	0	0	1	0	1	1	0	2	0
53	0	45	4.33	15.57	1.39	12.3	16.01	11.12	0.39	-0.408935	5.18	4a	1	0	1	1	0	0	0	0	0	0	1	1	0
54	0	53	4.49	16.42	2.46	0.3	48.57	29	1.29	0.11059	5.48	4b	1	1	1	1	0	1	0	1	0	1	1	1	0
55	0	22	4.7	16.42	1.43	172	13.45	4.96	0.33	-0.481486	2.55	4c	1	1	0	0	1	1	0	0	1	0	1	1	1
56	0	49	4.85	13.17	0.6	1.9	14.79	1.65	0.75	-0.124939	7.05	4a	1	0	1	0	0	0	0	1	0	1	0	1	0
57	1	35	5.52	16.15	1.12	49	13.41	0.86	0.59	-0.229148	9.2	5	1	1	0	0	0	0	1	0	0	0	1	1	0
58	0	56	5.4	18.5	1.48	1.95	13.69	17.2	0.63	-0.200659	3.89	4b	1	1	0	1	1	1	1	0	0	0	1	2	1
59	0	32	5.1	15.12	1.24	146	14.97	2.25	0.3	-0.522879	6.32	4b	1	0	1	1	1	1	0	1	0	1	1	2	0
60	0	73	5.16	19.02	0.21	298	16.71	5.14	1.33	0.123852	7.96	4a	1	1	1	0	1	0	0	1	0	1	1	1	0
61	0	37	5.93	19.3	1.18	5.7	19.14	2.03	0.25	-0.60206	10.6	4b	1	1	0	0	0	1	0	0	1	1	1	2	1
62	0	26	5.81	20.37	2.16	21.06	16.28	6.98	0.61	-0.21467	6.79	4a	1	0	1	0	1	1	1	1	1	1	0	1	1
63	1	24	5.3	16.36	1.22	57.1	15.08	1.77	0.37	-0.431798	11	4a	1	1	1	1	0	1	0	0	0	0	1	1	0
64	1	41	4.94	17.9	1.91	7.5	14.75	1.21	1.7	0.230449	8.21	4b	1	1	0	0	1	1	0	0	1	1	0	2	1
65	0	32	4.28	17.78	0.63	7.4	15.14	2.39	0.25	-0.60206	8.31	4a	1	1	0	0	1	0	1	1	0	1	0	2	1
66	1	50	4.51	15.06	1.11	6.5	15.5	0.79	0.28	-0.552842	17.4	4a	1	1	1	1	0	0	0	0	0	1	1	1	0
67	1	59	5.76	22.76	0.91	20.5	16.44	5.26	1.01	0.00432137	4.65	4a	1	1	0	0	0	1	1	0	0	0	1	2	1
68	0	38	5.32	19.83	0.56	12.6	112.6	3.07	0.25	-0.60206	3.06	4a	1	1	1	0	0	0	1	1	1	1	1	1	1
69	0	47	5.5	16.64	1.42	132	67.72	6.36	0.34	-0.468521	2	4a	1	1	1	0	1	0	1	1	0	1	1	1	0
70	1	43	6.31	18.34	4.08	124	17.1	5.47	1.04	0.0170333	10	4b	1	1	1	0	1	1	1	0	1	1	0	1	1
71	0	25	5.26	16.99	1.66	4.3	23.99	7.25	0.26	-0.585027	6.13	4b	1	1	1	0	0	0	0	0	0	0	1	2	1
72	1	60	6.29	18.59	1.34	20.1	17.25	2.04	0.25	-0.60206	10.4	4a	1	1	0	0	1	1	1	0	0	0	0	2	1
73	0	32	5.08	20.53	2.15	9.3	15.52	4.77	0.45	-0.346787	17.82	4a	1	1	0	1	1	1	0	0	1	1	0	3	1
74	0	32	5.14	18.61	1.64	7.5	16.91	2.04	0.3	-0.522879	2	4a	1	1	0	0	0	0	1	1	1	1	1	2	0
75	1	41	5.88	19.32	1.54	34.9	17.22	2.41	0.58	-0.236572	4.74	4c	1	1	1	1	1	1	1	0	1	1	0	2	1
76	0	37	4.64	18.91	3.48	24.4	111.4	2.86	0.25	-0.60206	3.26	4b	1	1	1	0	0	1	1	1	0	0	1	2	1
77	0	49	4.98	18.59	3.52	20.2	49.76	1.83	0.42	-0.376751	9.68	4a	1	1	1	1	1	1	0	0	1	1	0	1	0
78	0	61	4.87	16.68	0	53.7	20.84	2.14	5.2	0.716003	5.47	4c	1	0	1	1	1	1	0	1	1	1	0	1	1
79	0	28	5.79	19.31	0.12	27.9	19.46	5.88	0.5	-0.30103	5.18	4a	1	1	1	1	0	1	1	0	0	0	1	2	1
80	1	57	5.52	17.31	1.14	14.2	18.3	9.62	0.25	-0.60206	4.95	4a	1	1	0	0	0	0	0	1	1	0	1	4	0
81	0	52	4.85	13.7	1.05	79.1	12.77	5.45	1.01	0.00432137	5.97	3	1	1	1	1	1	1	0	1	1	0	1	2	1
82	0	34	5.32	16.93	1.8	4.9	19.79	3.85	0.25	-0.60206	2	4a	1	1	0	0	1	1	0	1	1	0	0	1	1
83	0	35	4.8	14.65	2.95	10.9	19.65	4.52	0.25	-0.60206	2	4b	1	1	1	0	0	1	1	1	0	0	1	2	1
84	1	22	5.39	17.79	0.8	500	20.28	3.62	0.25	-0.60206	10.9	4b	1	1	1	1	0	0	0	1	0	0	0	1	1
85	0	49	4.56	13.95	2.29	22.4	17.89	3.17	0.25	-0.60206	2.91	4b	1	1	1	1	1	0	0	1	1	0	0	2	0
86	0	51	4.87	20.51	0.06	1.3	14.08	2.45	0.43	-0.366532	2	4a	0	1	1	0	0	0	0	0	1	1	1	4	0
87	0	34	4.3	15.42	1.07	6.2	40.98	5.89	0.25	-0.60206	2	4a	1	1	1	1	0	0	1	0	0	1	0	2	1
88	1	67	5.28	15.12	3.46	8.3	14.56	1.29	0.79	-0.102373	7.66	4a	1	1	0	1	0	1	0	1	0	0	1	2	0
89	0	32	4.81	14.39	2.09	15.3	15.63	6.03	1.12	0.049218	9.49	4a	1	1	1	1	0	1	1	0	0	0	1	2	0
90	0	69	3.98	18.11	0.74	21.61	19.76	11.1	0.47	-0.327902	10.94	4b	1	1	0	0	0	1	0	0	0	0	1	3	1
91	0	55	4.66	15.18	1.18	0.5	43.61	3.23	0.25	-0.60206	2	4a	0	1	0	0	1	0	1	1	0	1	1	2	0
92	0	43	4.99	16.45	1.79	10	20.93	4.19	0.25	-0.60206	10.2	4a	1	0	1	0	0	1	0	0	0	0	1	2	1
93	1	34	5.23	17.27	1.12	5.5	14.29	2.27	0.25	-0.60206	9.84	4b	1	1	1	0	0	1	0	0	0	1	0	4	1
94	0	54	4.74	14.69	1.9	83.1	14.27	1.17	1.19	0.075547	3.39	4b	1	1	1	0	0	1	0	0	1	0	1	2	0
95	0	42	4.23	17.04	4.38	1.7	30.78	11.5	0.62	-0.207608	9.98	4b	1	1	1	1	0	1	0	1	1	0	0	2	0
96	1	43	5.41	16.43	2.66	22.7	15.28	1.35	1.11	0.045323	11.3	4b	1	0	0	0	0	1	1	0	1	0	1	3	1
97	1	26	5.74	15.01	1.41	12.4	16.7	5.64	0.25	-0.60206	3.82	4c	1	1	1	1	1	1	0	0	0	1	0	2	1
98	1	34	6.83	20.87	1.09	34.4	20.75	10.2	0.25	-0.60206	4.43	4b	1	1	1	1	1	0	1	1	0	1	0	4	1
99	0	61	4.44	18.22	3.16	16	16.08	17.8	0.43	-0.366532	4.55	4b	1	0	1	1	1	0	0	0	0	0	1	3	1
100	0	28	6.07	13.78	1.46	145	21.45	5.37	0.55	-0.259637	2	4c	1	1	1	0	1	1	1	0	0	0	1	4	1
101	0	47	5.01	15.69	1.35	19.6	12.91	10.8	0.98	-0.00877392	2	4b	1	1	1	0	1	0	1	1	1	0	1	3	1
102	1	62	4.82	12.27	0.59	33.3	19.24	6.3	0.59	-0.229148	3.12	4a	1	1	1	0	1	0	1	0	0	0	1	2	1
103	0	38	4.97	15.67	1.76	28.9	10.9	1.73	0.26	-0.585027	2.88	4b	0	0	1	0	1	0	0	0	1	1	1	3	0
104	0	29	4.96	17.08	1.58	55.4	17.14	40.5	0.67	-0.173925	2	4a	1	0	1	0	0	0	0	1	1	0	1	2	0
105	1	61	6.56	17.2	1.02	27.9	12.43	0.62	0.38	-0.420216	11.3	4b	1	1	0	1	1	1	1	1	0	1	1	4	1
106	1	59	5.05	14.99	1.35	21.7	13.93	4.11	0.75	-0.124939	15.5	4b	1	1	1	1	1	0	0	0	1	1	1	2	0
107	0	59	5.28	15.92	1.32	97	10.9	0.96	0.42	-0.376751	7.35	4b	1	1	1	0	0	0	0	1	0	1	0	3	0
108	1	52	5.21	16.96	2.65	3.9	15.54	3.72	0.54	-0.267606	12.2	4a	1	1	1	1	1	0	1	0	0	0	1	3	0
109	0	35	4.85	16.21	1.86	33	17.83	1.02	0.47	-0.327902	2.59	4b	1	1	0	0	0	1	0	0	1	1	1	3	0
110	0	27	4.61	16.26	1.17	10.5	15.49	0.38	0.88	-0.0555173	8.27	4b	1	1	1	1	1	0	1	0	0	1	0	3	0
111	0	42	5.66	17.03	0.45	19.4	13.87	18	0.97	-0.0132283	3.84	4b	1	0	1	1	0	1	0	0	0	1	0	3	0
112	1	48	5.64	17.76	1.98	8.8	12.49	2.17	0.93	-0.0315171	15.2	4b	1	1	1	1	0	1	1	1	1	0	1	3	1
113	0	75	4.36	15.52	2.89	21.7	11.87	0.38	0.46	-0.337242	6.68	4a	1	1	1	1	0	0	1	1	0	1	1	3	0
